# Supplementary material for: Synergistic toughening of epoxy with carbon nanotubes and graphene oxide for improved long-term performance
Source: Royal Society of Chemistry journal article supplement (doi:10.1039/c3ra22300k), 2013-01-01
Supplement: c3ra22300k.pdf [file c3ra22300k.pdf]

## Supporting information

Table 1. The composition and tensile properties of prepared CNT/epoxy, GO/epoxy and CNT-GO/epoxy samples.

| Sample type | Composition (wt%) |     | Ultimate Stress (MPa) |       | Young's Modulus (GPa) |      | Failure Strain (%) |       | Toughness* (MPa) |       |
|-------------|-------------------|-----|-----------------------|-------|-----------------------|------|--------------------|-------|------------------|-------|
|             | CNT               | GO  | Mean                  | SD    | Mean                  | SD   | Mean               | SD    | Mean             | SD    |
|             | 1                 | 0   | 0                     | 44.27 | 4.01                  | 1.64 | 0.13               | 10.93 | 3.70             | 40.32 |
| 2           | 0.04              | 0   | 39.58                 | 2.51  | 1.80                  | 0.08 | 6.06               | 1.12  | 19.79            | 5.00  |
| 3           | 0                 | 0.2 | 44.46                 | 1.29  | 1.74                  | 0.06 | 20.52              | 8.13  | 81.88            | 32.32 |
| 4           | 0.02              | 0.2 | 46.79                 | 2.36  | 1.76                  | 0.13 | 15.78              | 4.38  | 62.9             | 19.9  |
| 5           | 0.04              | 0.2 | 50.10                 | 2.03  | 1.86                  | 0.20 | 19.60              | 4.91  | 79.54            | 21.58 |
| 6           | 0.06              | 0.2 | 46.53                 | 2.36  | 1.95                  | 0.07 | 12.61              | 4.10  | 49.22            | 16.11 |
| 7           | 0.08              | 0.2 | 38.76                 | 2.44  | 1.58                  | 0.08 | 10.04              | 4.13  | 33.05            | 13.26 |
| 8           | 0.02              | 0.1 | 46.75                 | 2.31  | 1.76                  | 0.12 | 14.36              | 4.91  | 56.95            | 21.73 |
| 9           | 0.06              | 0.3 | 40.21                 | 1.73  | 1.74                  | 0.10 | 18.46              | 6.98  | 59.73            | 23.34 |

\*Toughness: the area under the stress-strain curve.
